# Supplementary material for: Thermoelectric scaling laws and Mott relation breakdown in the field-induced Weyl metallic state of Bi1-xSbx (x ~ 3-4 %)
Source: Research Square preprint supplement (doi:10.21203/rs.3.rs-8706516/v1), 2026-02-16
Supplement: Supplementary file 1 [file 591fa76130e6271433e21603.docx]

**Thermoelectric scaling laws and Mott relation breakdown in the field-induced Weyl metallic state of Bi1-*x*Sb*x* (*x* ~ 3-4 %)**

**Yusuff Adeyemi Salawu1, Dilanath Adhikari1, Jin Hee Kim2, Jong-Soo Rhyee2, Minoru Sasaki3, Geunsik Lee4, Ki-Seok Kim5,*, and Heon-Jung Kim 1,6†**

1Department of Physics, College of Natural Science, Daegu University, Gyeongbuk 712-714, Republic of Korea

2Department of Applied Physics and Institute of Natural Sciences, Kyung Hee University, Yong-In, 17104, Republic of Korea

3Department of Physics, Faculty of Science, Yamagata University, Kojirakawa, Yamagata 990-8560, Japan

4Department of Chemistry, College of Natural Science, Ulsan National Institute of Science and Technology, Ulsan 44919, Republic of Korea

5Department of Physics, Pohang University of Science and Technology (POSTECH), Pohang, Gyeongbuk 790-784, Republic of Korea

6Department of Materials-Energy Science and Engineering, College of Engineering, Daegu University,

Gyeongbuk 38453, Republic of Korea.

*tkfkd@postech.ac.kr

**†**hjkim76@daegu.ac.kr

**Supplementary Text**

**Temperature dependence of resistivity and Seebeck coefficient**

Figures S1(a) and (b) present the temperature dependence of resistivity, , for the Bi1-*x*Sb*x* (*x* ~ 3-4%) single crystal in the absence of an external magnetic field for the transverse. The zero-field for the Bi1-*x*Sb*x* (*x* ~ 3-4%) sample shows a slight increase below 100 K and continues to increase monotonically from 100 K to 300 K, in agreement with previous findings ([*1-5*](#_ENREF_1)). The overall temperature dependence of is relatively weak.

The temperature dependencies of the transverse, is illustrated in Fig. S1(b) in absence of magnetic field. The negative Seebeck coefficient, , decreases as the temperature decreases from 300 K to 100 K and then quickly increases to approach zero. It is noteworthy that the negative signals indicate that electrons are the dominant carriers in this system, even though both electrons and holes are present.

**Scaling relation between Nernst effect and Seebeck coefficient for the Bi1-*x*Sb*x* (*x* ~ 3-4%) single crystal**

Figure S2(a) and Figure S2(b) present the plots of versus *σ*xy and and *σ*xy, respectively,for the Bi1-*x*Sb*x* (*x* ~ 3-4%) single crystal. These plots aimed to explore relationship between and *σ*xx, as well as and *σ*xy, to gain insights into their correlation. However, no linear relationship between and *σ*xy or between and *σ*xy was observed.

**Scaling relation between Nernst effect and Seebeck coefficient for the reference data on Co3Sn2S2**

Figure S3(a) [Figure S3(b)] shows the plot between *S*xx and *σ*xx [xy and *σ*xy] for the reference data on Co3Sn2S2 ([*6*](#_ENREF_6)). These plots were specifically utilized to investigate any potential relationship between *S*xx and *σ*xx [xy and *σ*xy], which can provide valuable insights into their correlation. The analysis of previous data on Co3Sn2S2 [6](#_ENREF_6)reveals universal scaling behavior in the plot of and as function of and , respectively. This is illustrated in Fig. S2(c) and Fig. S3(d), where = 0.8 and = 0.3. These findings highlight that the Mott relation is valid in this system for xx (*σ*xx) and (*σxy*) as shown in Fig. S3(b) and (c). The log-log plot of as a function of with suitable *δ* and *γ* values when *v* = 1, shows good scaling of the experimental results, as shown in Fig. 4(e). It can also be seen that this scaling is better compared to the simple and scaling as shown in Fig. S3(e). This confirms a linear scaling relation for the anomalous contribution of the Nernst coefficient from Co3Sn2S2, which is known to follow the Mott relation.

**Reference**

1 D. Vu, W. Zhang, C. Şahin, M. E. Flatté, N. Trivedi, and J. P. Heremans, Nature Materials **20**, 1525 (2021).

2 F. Nakamura, et al., Physical Review B **84**, 235308 (2011).

3 Y.-H. Su, W. Shi, C. Felser, and Y. Sun, Physical Review B **97**, 155431 (2018).

4 A. Banerjee, B. Fauqué, K. Izawa, A. Miyake, I. Sheikin, J. Flouquet, B. Lenoir, and K. Behnia, Physical Review B **78**, 161103 (2008).

5 Y. A. Salawu, J. H. Yun, J.-S. Rhyee, M. Sasaki, and H.-J. Kim, Scientific Reports **12**, 1 (2022).

6 L. Ding, et al., Physical Review X **9**, 041061 (2019).


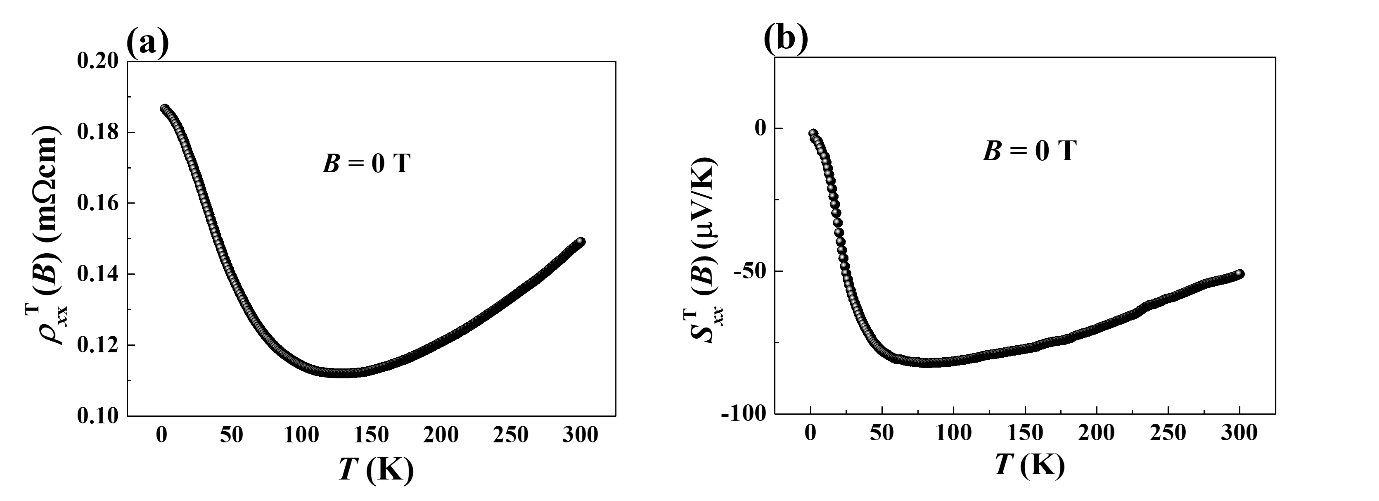


**Figure S1**: **(a)** The temperature dependences of the transverse resistivity [] for the Bi1-*x*Sb*x* (*x* ~ 3-4%) single crystal. **(b)** The temperature dependences of the transverse magneto-Seebeck coefficient [] for the Bi1-*x*Sb*x* (*x* ~ 3-4%) single crystal.


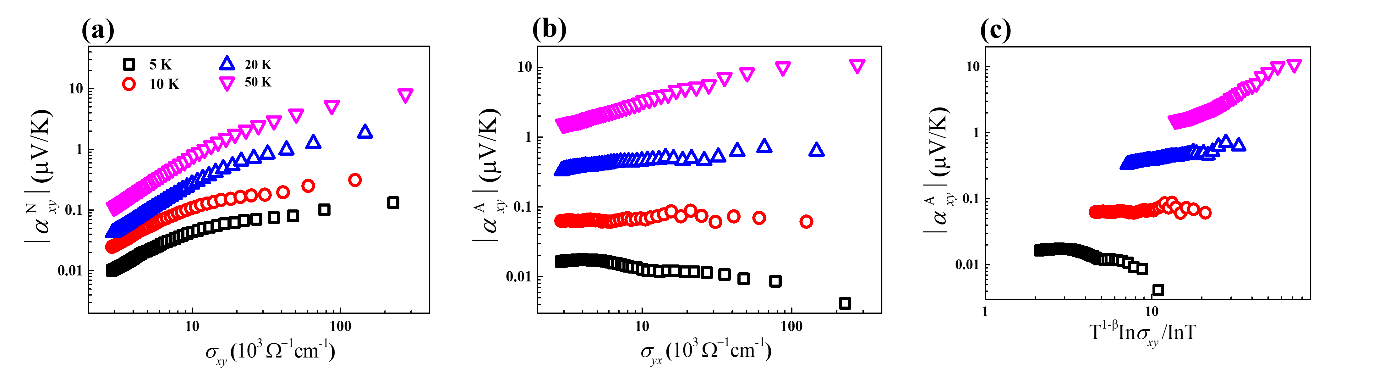


**Figure S2**: **(a)** normal component of transverse thermoelectric conductivity as a function of Hall conductivity for the Bi1-*x*Sb*x* (*x* ~ 3-4%) single crystal. **(b)** anomalous component of transverse thermoelectric conductivity as a function of Hall conductivity. **(c)** anomalous component of transverse thermoelectric conductivity versus .


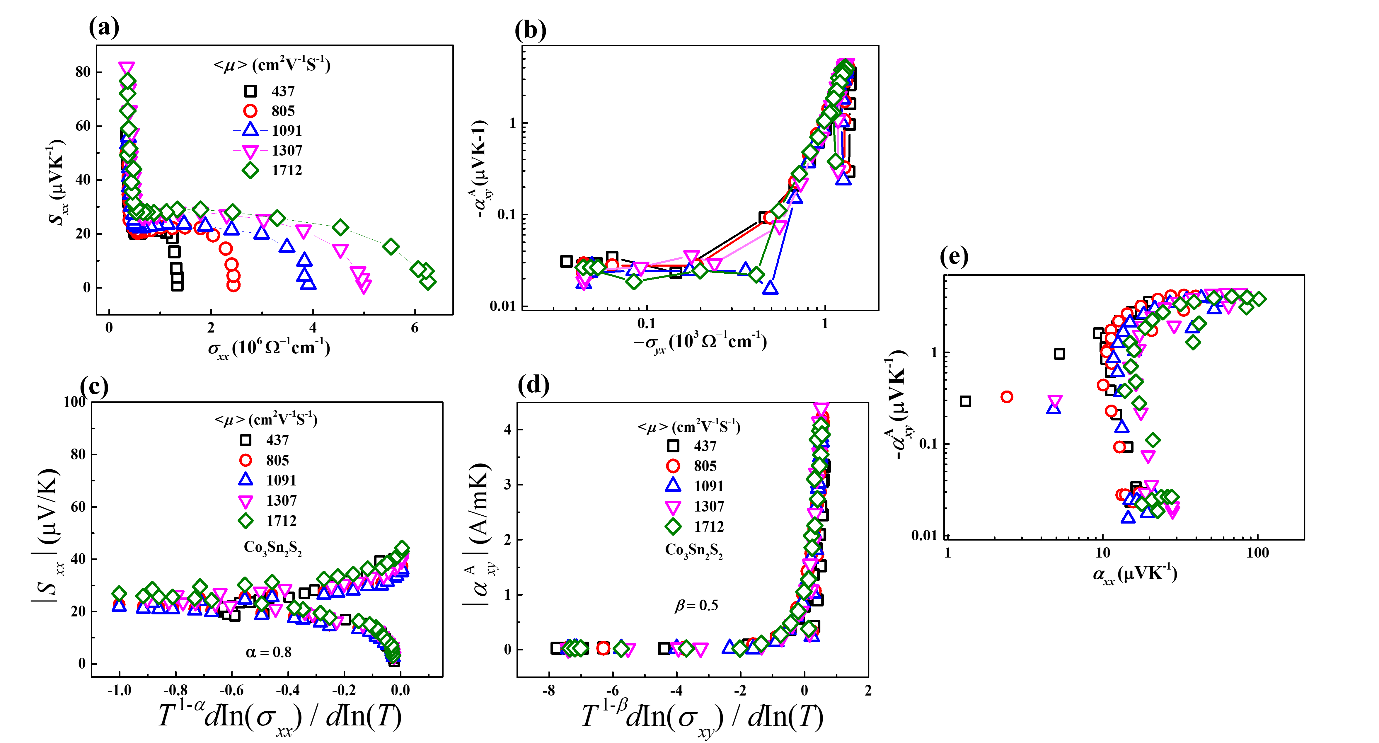


**Figure S3**: **(a)** Seebeck coefficient *Sxx* as a function of conductivity for the reference data on Co3Sn2S2[6](#_ENREF_6) **(b)** Anomalous component of transverse thermoelectric conductivity as a function of Hall conductivity for the reference data on Co3Sn2S2. **(c)** xx versus from the analysis of previous data on Co3Sn2S2 . **(d)** versus from the analysis of previous data on Co3Sn2S2. **(e)** Anomalous component of transverse thermoelectric conductivity as a function of longitudinal thermoelectric conductivity *xx* for the reference data on Co3Sn2S2..
